# Supplementary material for: Prospective function of FtsZ proteins in the secondary plastid of chlorarachniophyte algae
Source: PubMed Central journal article supplement (PMC4641359; doi:10.1186/s12870-015-0662-7), 2015-11-10
Supplement: 12870_2015_662_MOESM1_ESM.pdf [file 12870_2015_662_MOESM1_ESM.pdf]

Table S1. Primer sequences for plasmid construction

| Fragment name | Sequence (5' to 3')          | note              |
|---------------|------------------------------|-------------------|
| AaFtsZD1-90   | ACCAAGCTTATGCCAACTCCAGCCC    | Forward (HindIII) |
|               | ACACCATGGGAGCCTTACCCGCTTCCGA | Revers (NcoI)     |
| AaFtsZD2-92   | ACCAAGCTTATGTCTGCTGTGGCTCG   | Forward (HindIII) |
|               | ACACCATGGAGCTATAGTTGATGTCATC | Revers (NcoI)     |

Table S2. Primer sequences for real-time quantitative PCR

| Fragment name | Sequence (5' to 3')     | note    |
|---------------|-------------------------|---------|
| BnftsZD-1     | GTCGAGTTCTGGGCAGTCAATAC | Forward |
|               | ATTGTAGGTTTCGCTCCTGCTC  | Reverse |
| BnftsZD-2     | AATGGCAGCTATCACGTCTCC   | Forward |
|               | CTCTGCGACACGATTGACC     | Reverse |
| Bn18rRNA      | TGCCAGGCGATAGTTCATTC    | Forward |
|               | TTGGATGTGGTAGCCGTTTC    | Reverse |
